# Supplementary figures and images for: JNK pathway suppression drives resistance to combination endocrine therapy and CDK4/6 inhibition in ER+ breast cancer
Source: Research Square preprint supplement (doi:10.21203/rs.3.rs-5920749/v1), 2025-02-10

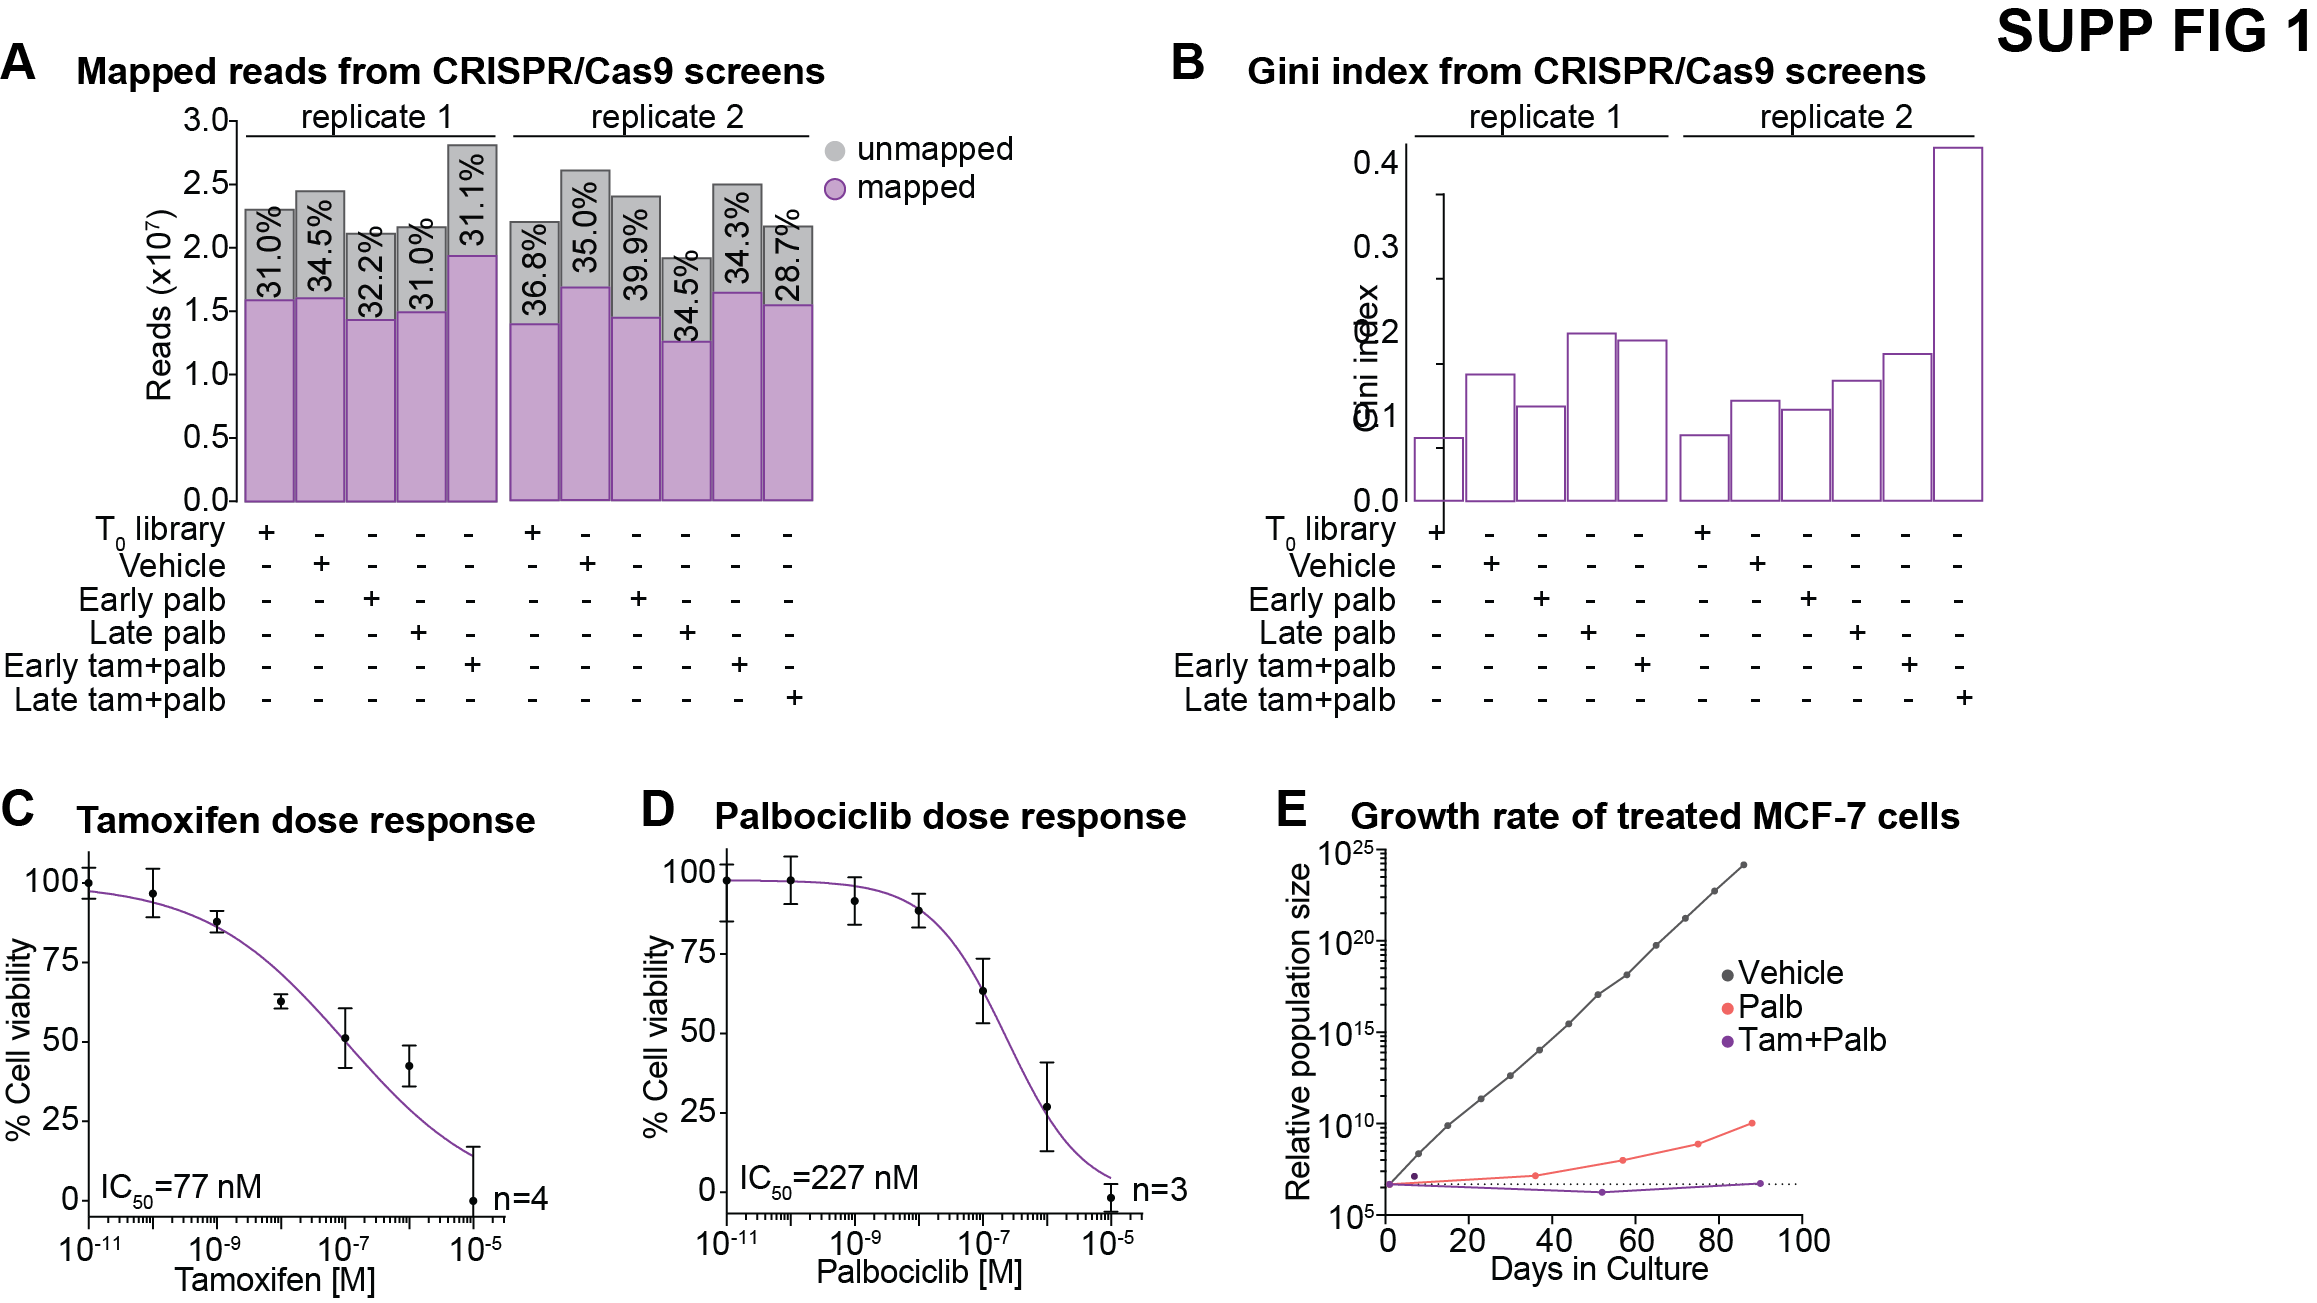

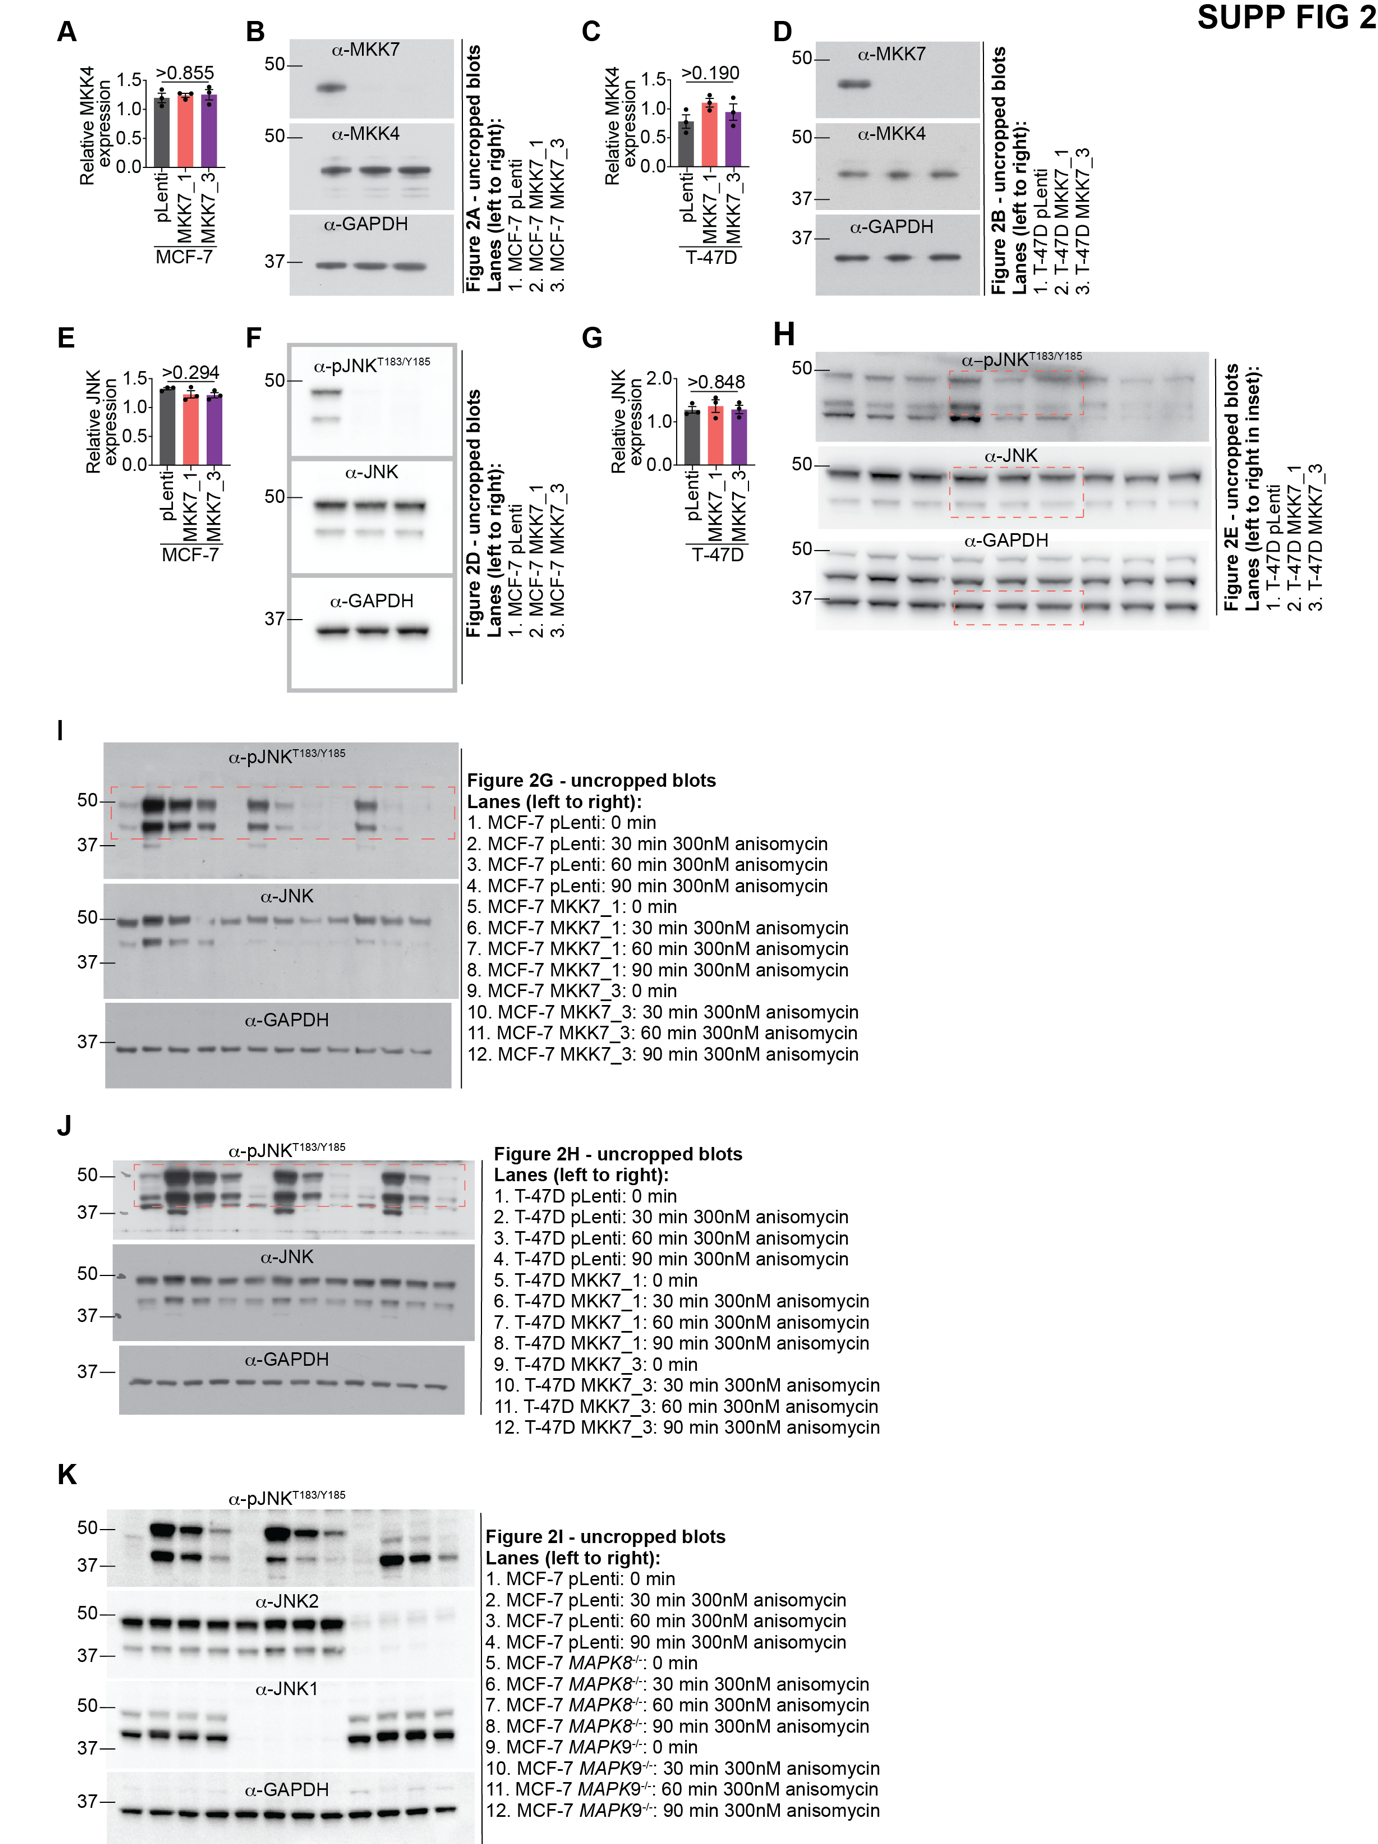

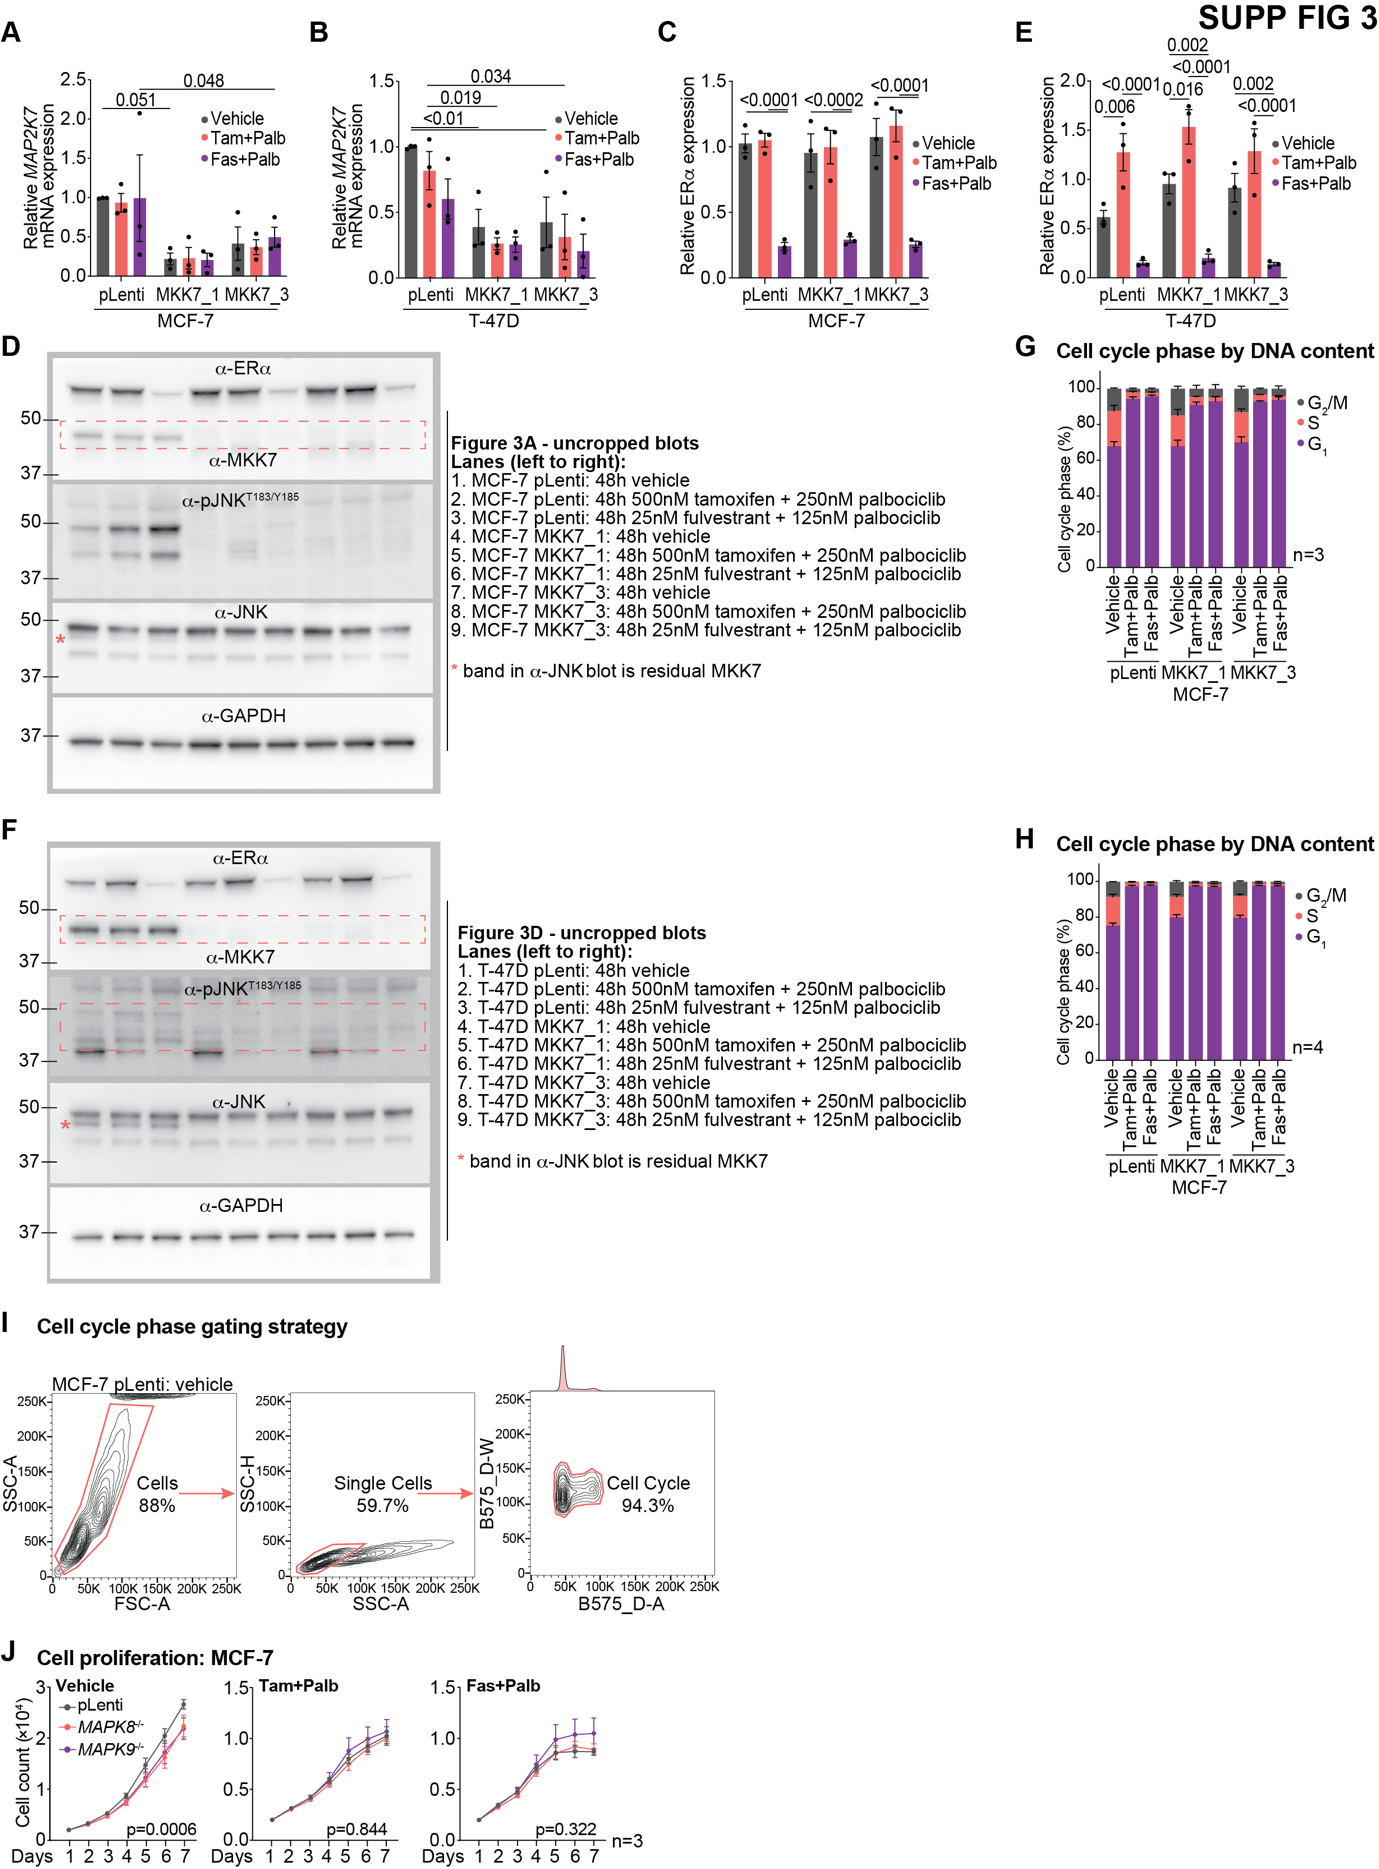

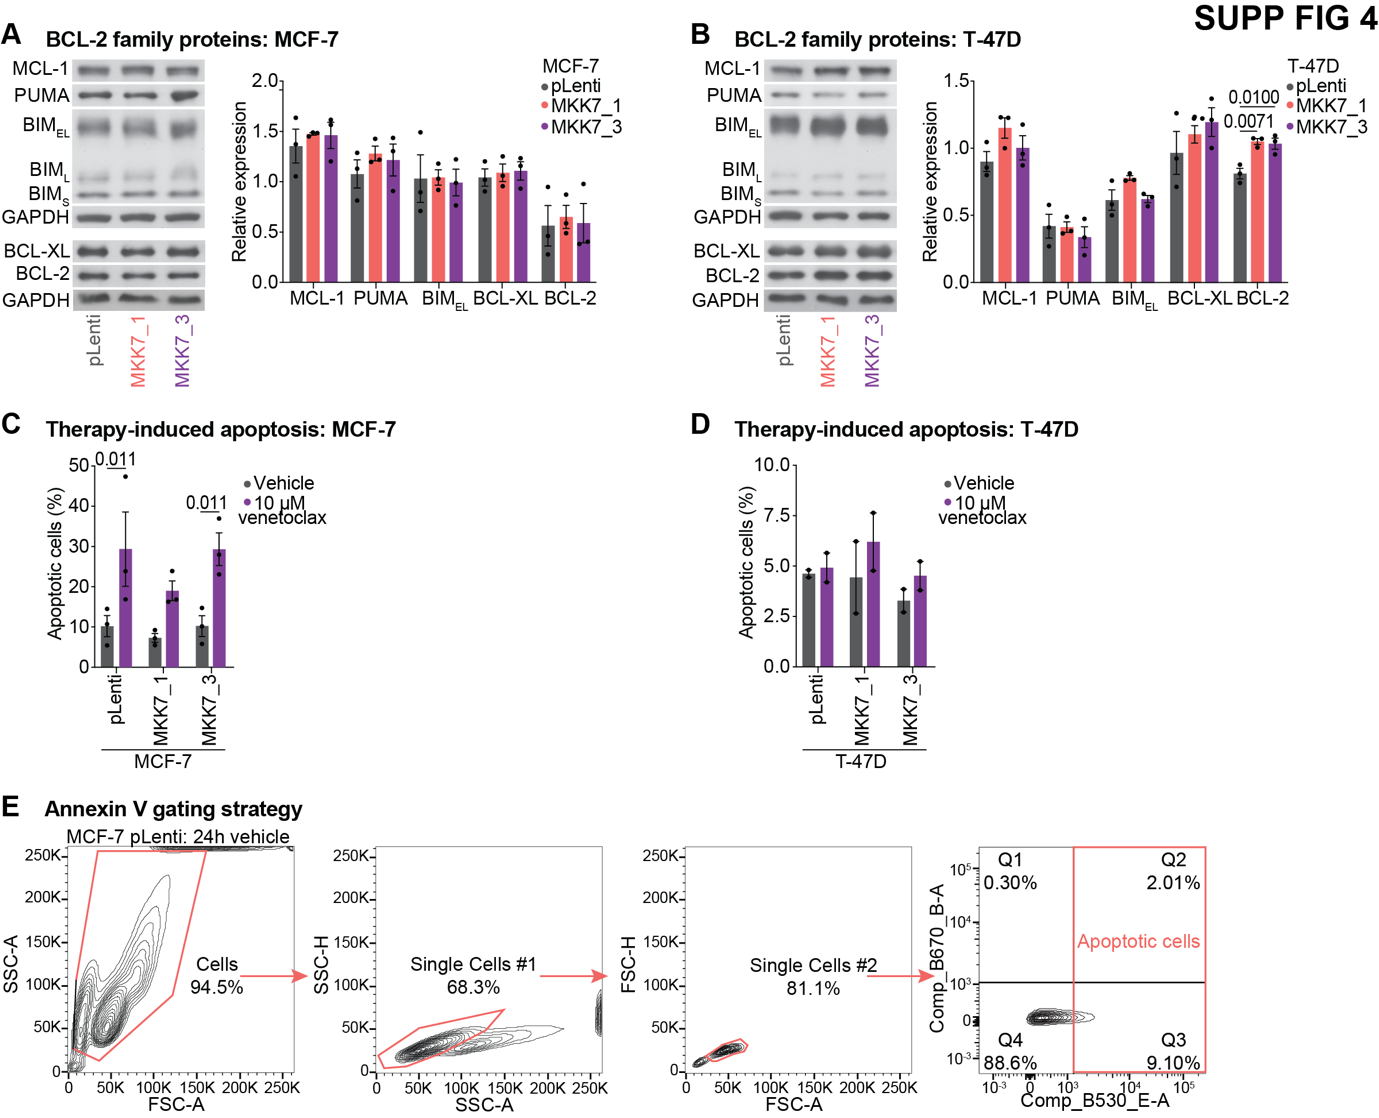

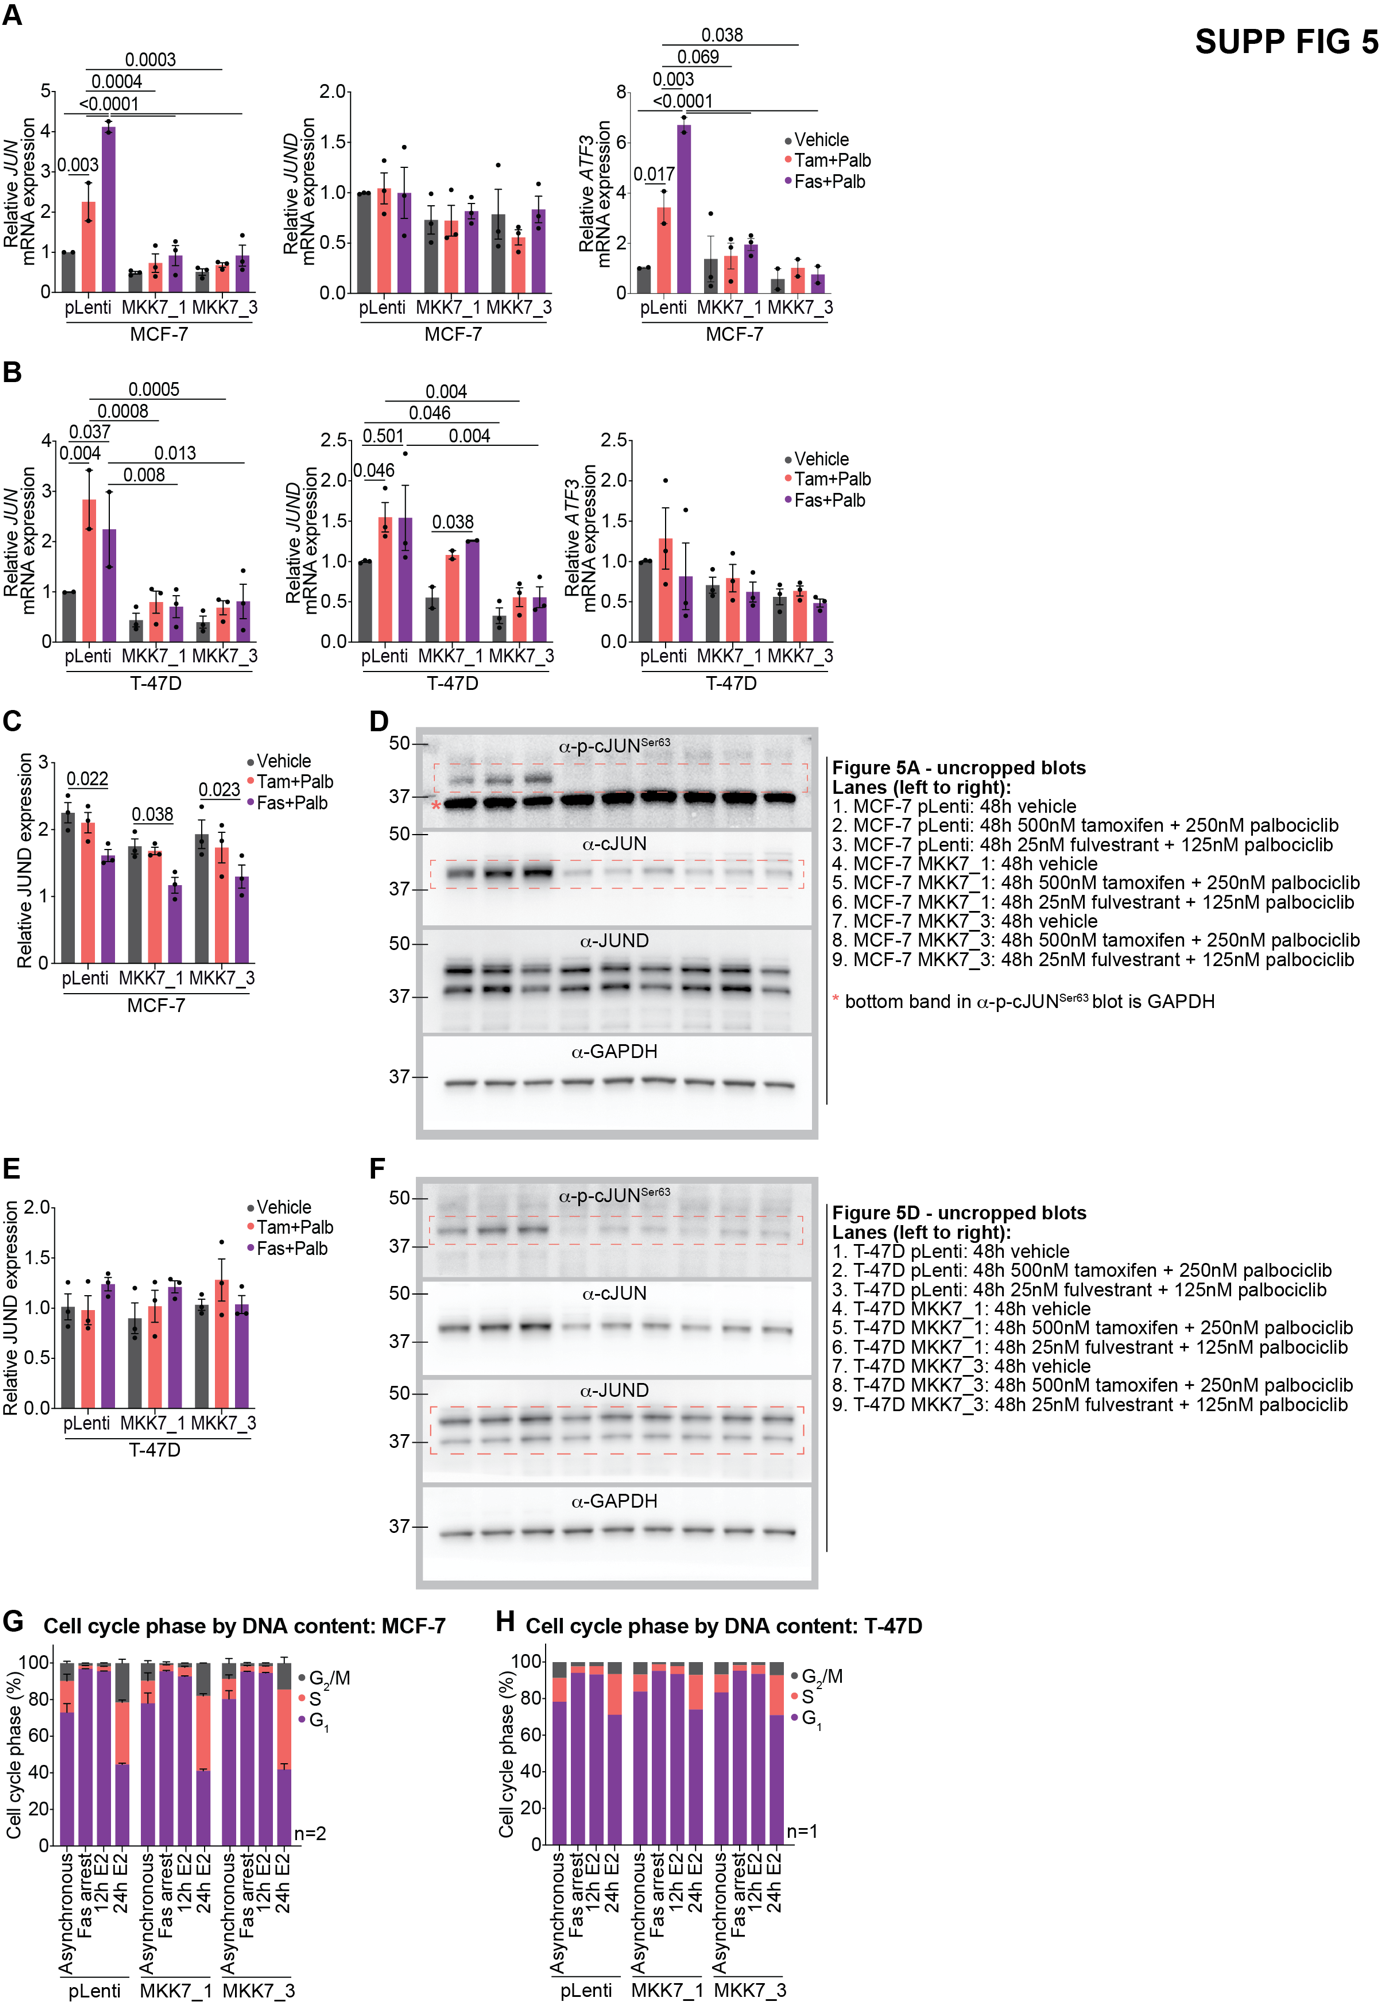

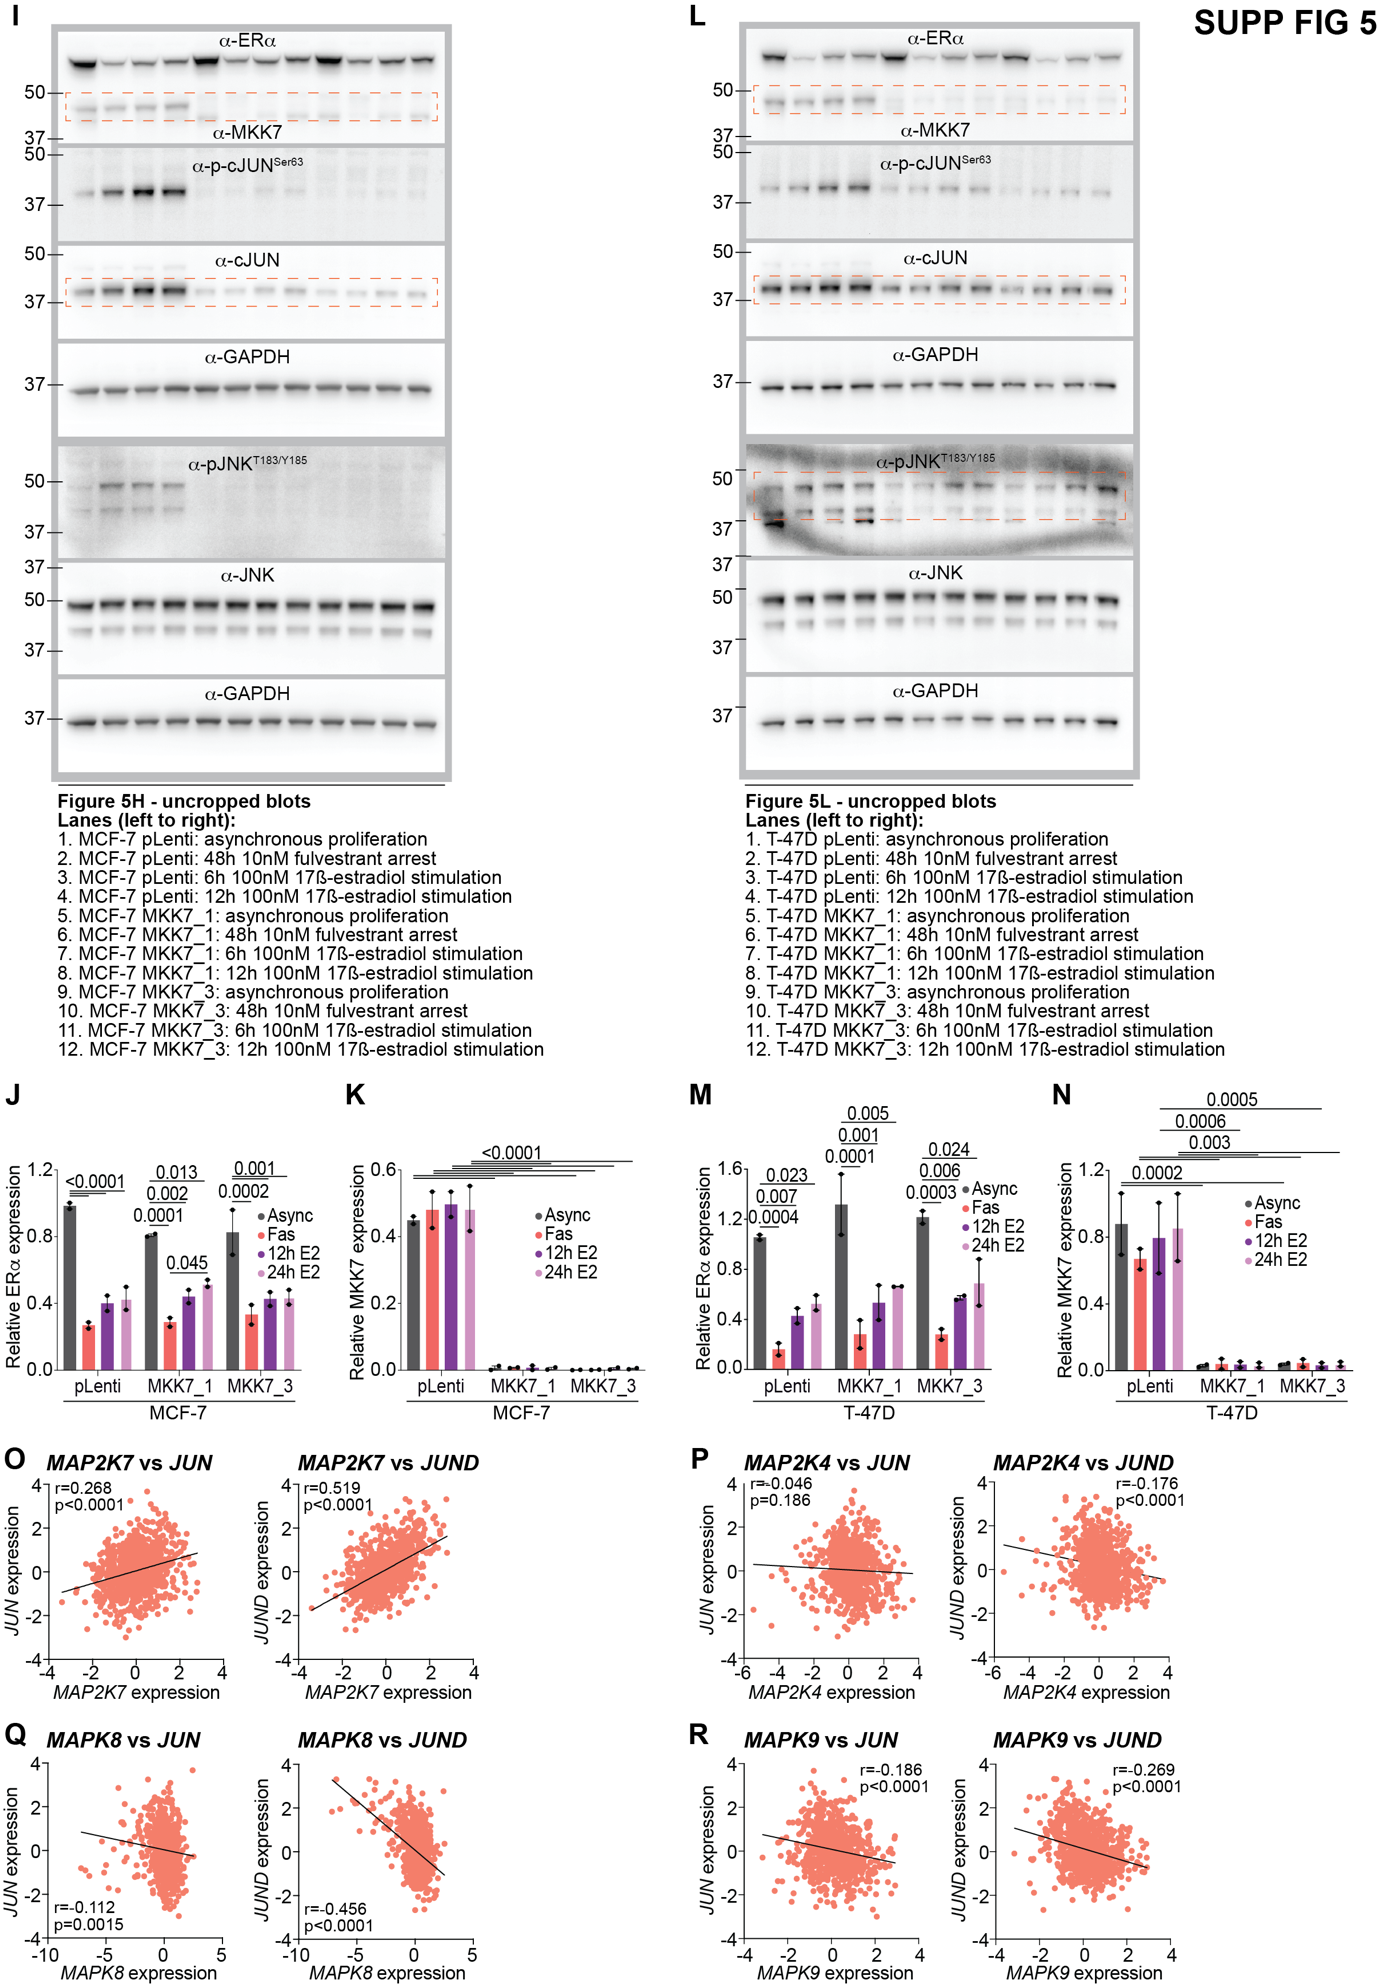

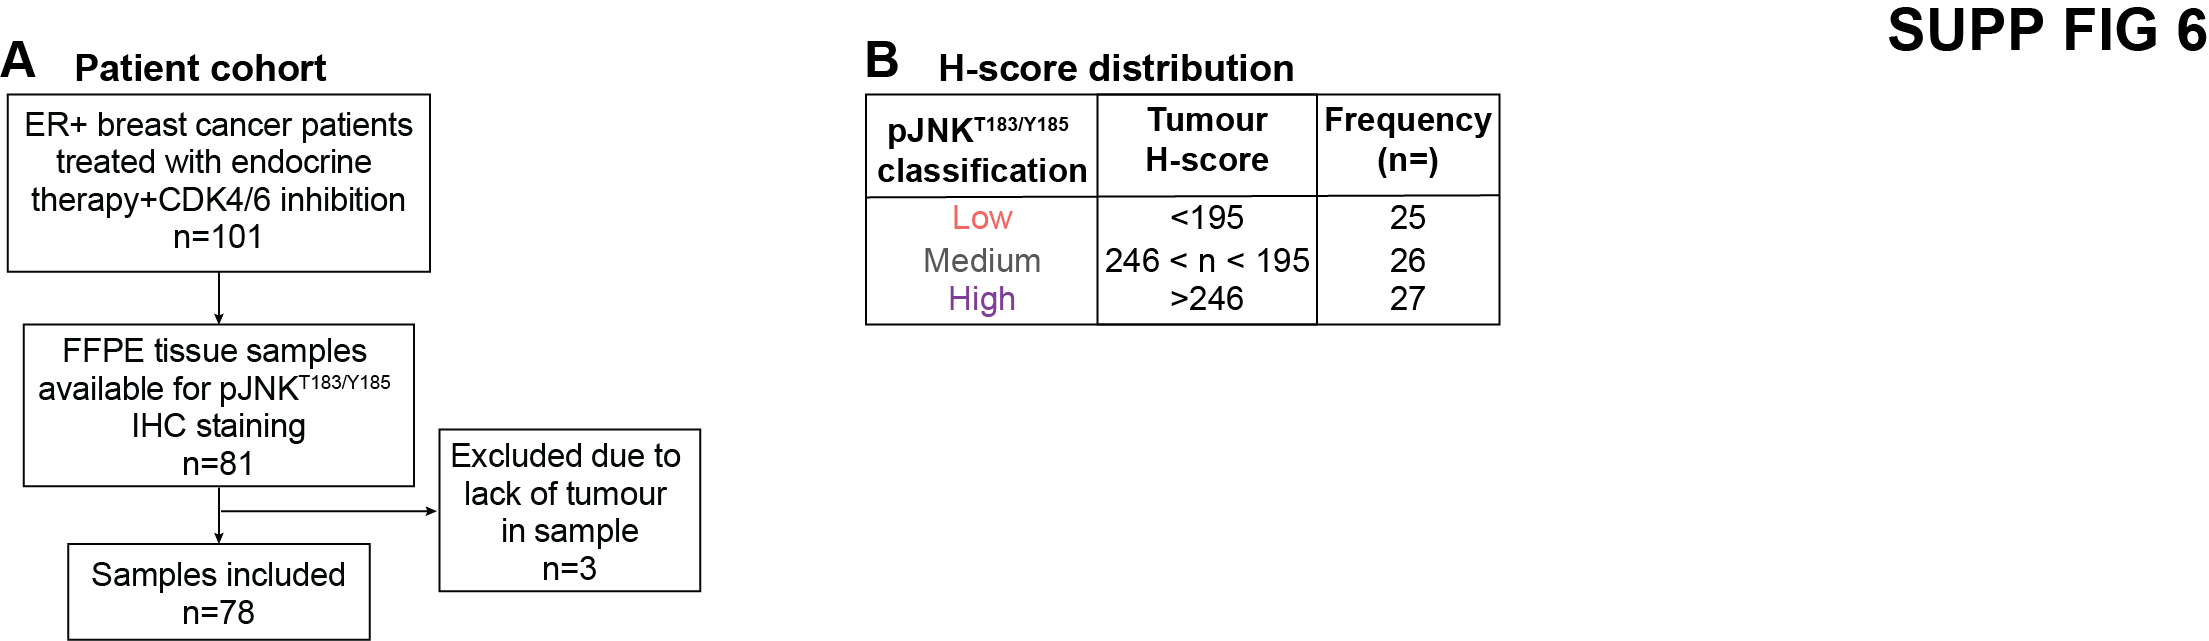

Supplement: Supplementary file 5 [file ef2cac33241a812d7486f26b.docx]
